# Supplementary figures and images for: Correcting Caudal Septal Deviation with a Modified Horizontal Mattress Suture
Source: PubMed Central journal article supplement — Plast Reconstr Surg Glob Open. 2021 Dec 17;9(12):e3988. doi: 10.1097/GOX.0000000000003988 (PMC8683208; doi:10.1097/gox.0000000000003988), 2021-12-17

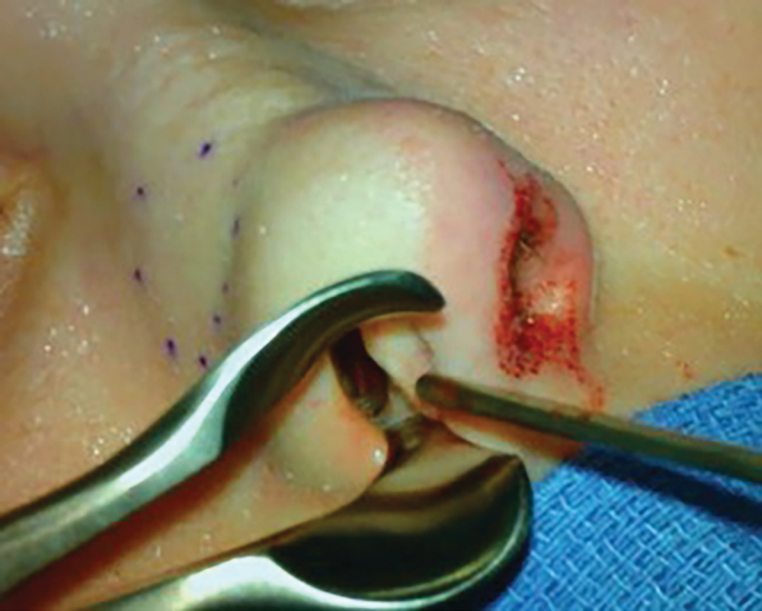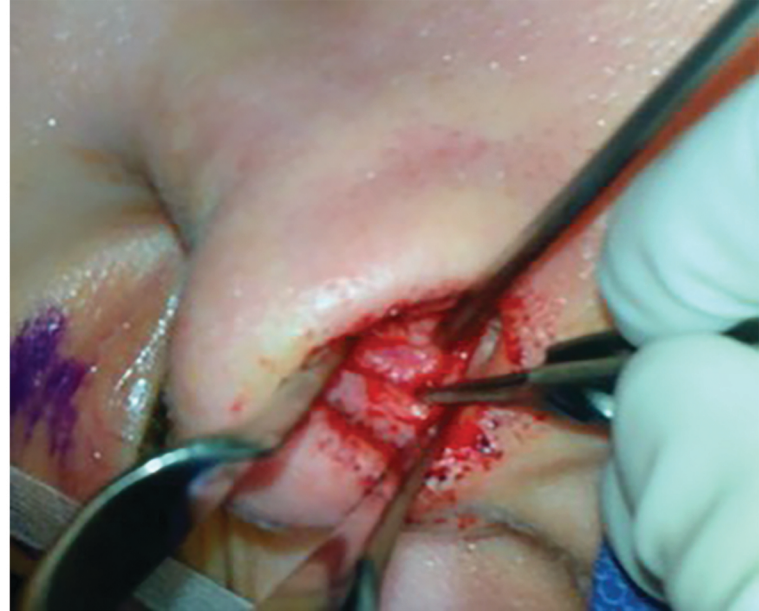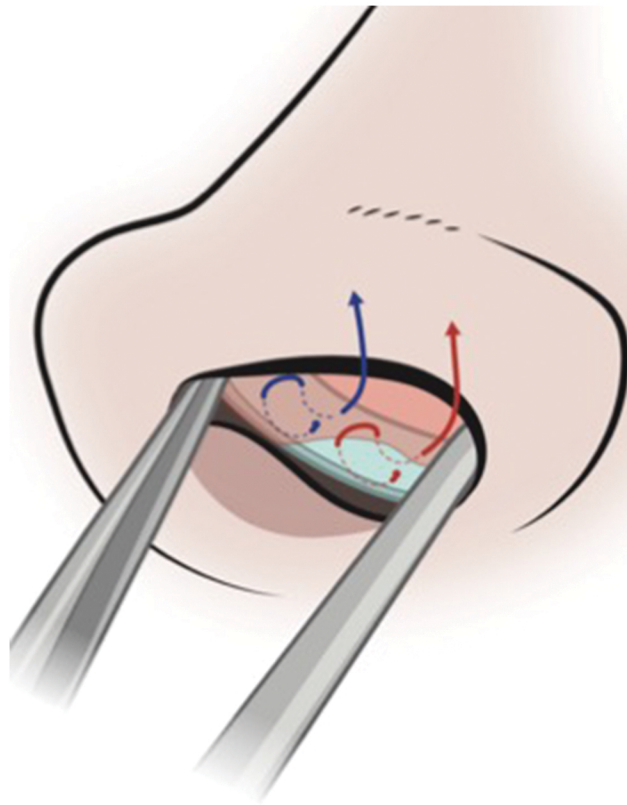

Supplement: gox-9-e3988-s002.pdf [file gox-9-e3988-s002.pdf]
